# Supplementary material for: Plasmonic Ag@Cu 2 O core–shell nanostructures exhibiting near-infrared photothermal effect
Source: Royal Society of Chemistry journal article supplement (doi:10.1039/d3ra06712b), 2023-01-01
Supplement: d3ra06712b1.pdf [file d3ra06712b1.pdf]

# Plasmonic Ag@Cu<sub>2</sub>O Core-Shell Nanostructures

## Exhibiting Near-Infrared Photothermal Effect

Mariia Ivanchenko,<sup>†</sup> Alison L. Carroll,<sup>†</sup> Andrea B. Brothers,<sup>§</sup> and Hao Jing<sup>†,\*</sup>

<sup>†</sup> Department of Chemistry and Biochemistry, George Mason University, Fairfax, Virginia 22030, USA

<sup>§</sup> Department of Chemistry, American University, Washington, DC 20016, USA

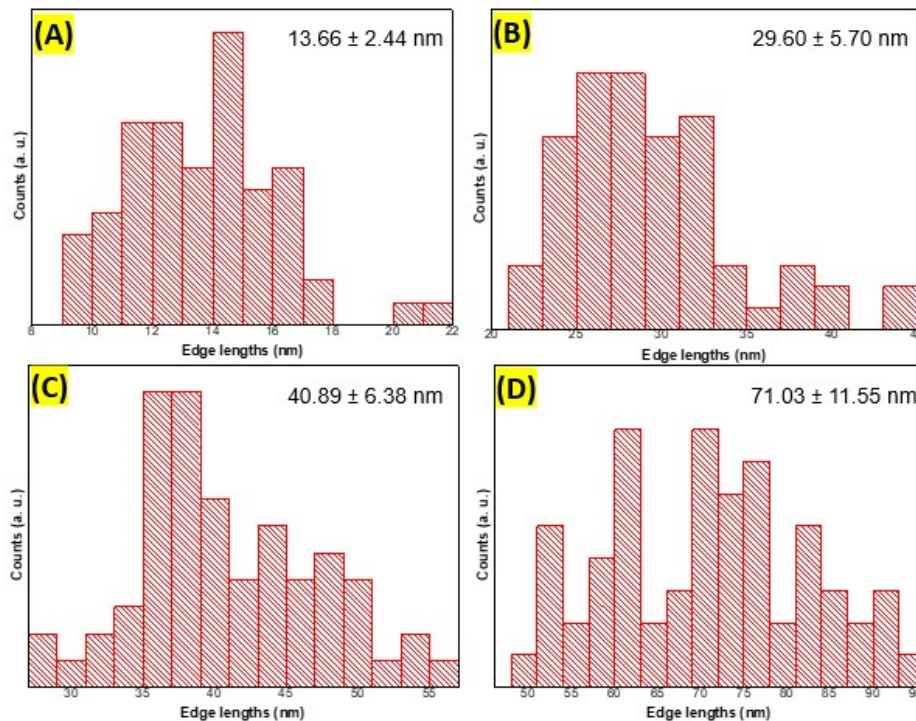

**Fig. S1.** Distribution of Cu<sub>2</sub>O shell thickness measured from TEM images of Au@Cu<sub>2</sub>O NPs synthesized using (A) 10 μL, (B) 20 μL, (C) 30 μL, (D) 40 μL of 0.1 M Cu(NO<sub>3</sub>)<sub>2</sub>.

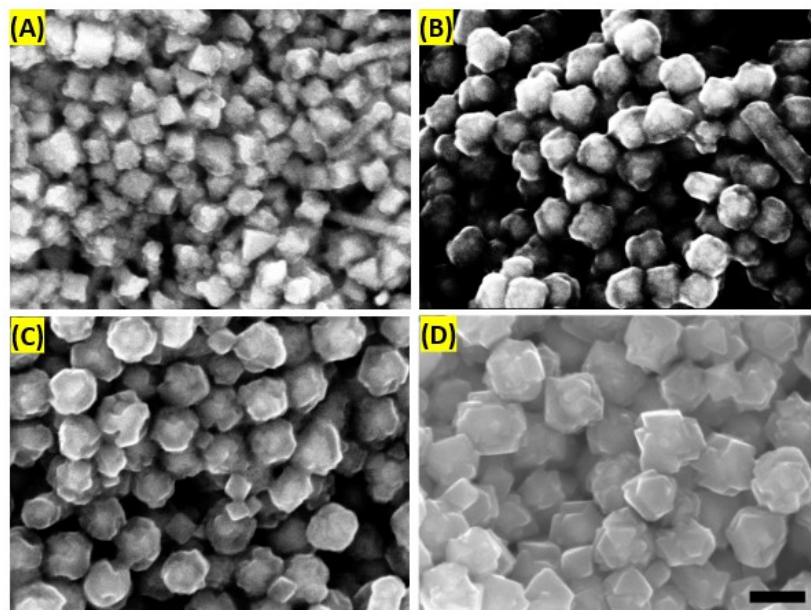

**Fig. S2.** SEM images of Ag@Cu<sub>2</sub>O nanoparticles obtained using (A) 10 μL, (B) 20 μL, (C) 30 μL, (D) 40 μL of 0.1 M Cu(NO<sub>3</sub>)<sub>2</sub>.

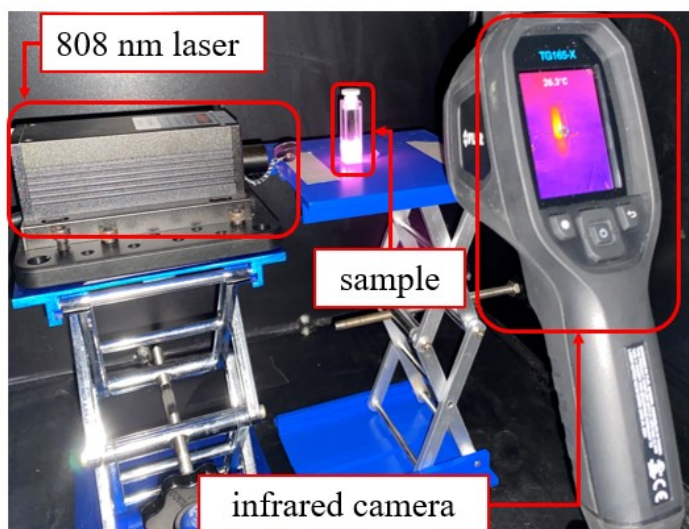

**Fig. S3.** Photothermal Heating Set Up.

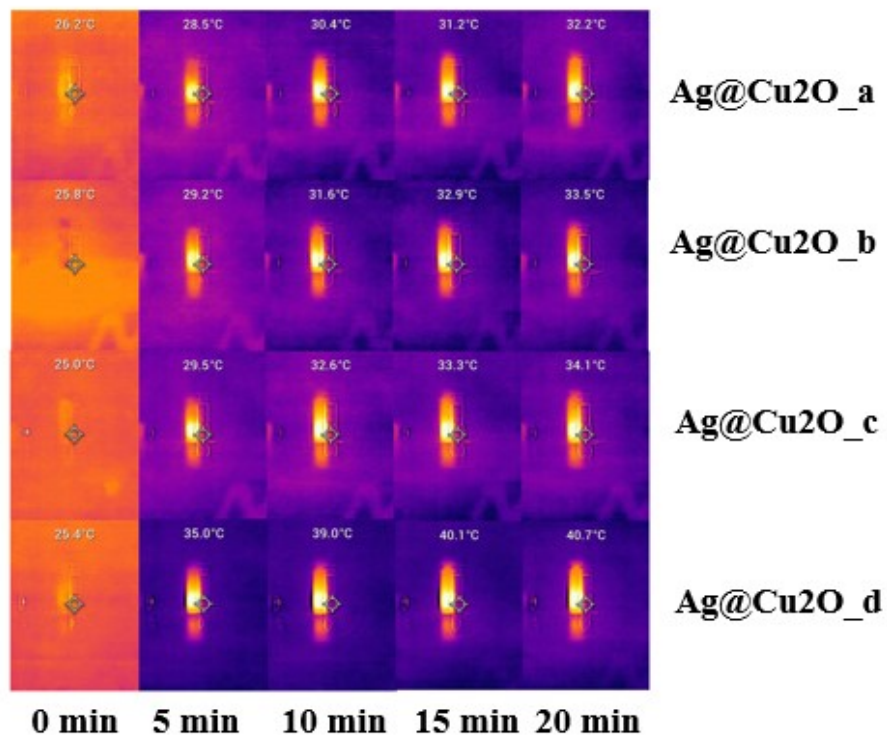

**Fig. S4.** Infrared thermal images showing temperature measurements of Ag@Cu<sub>2</sub>O colloidal solutions synthesized adding (a) 10  $\mu$ L, (b) 20  $\mu$ L, (c) 30  $\mu$ L, (d) 40  $\mu$ L of 0.1 M Cu(NO<sub>3</sub>)<sub>2</sub> under continuous 808 nm laser illumination.

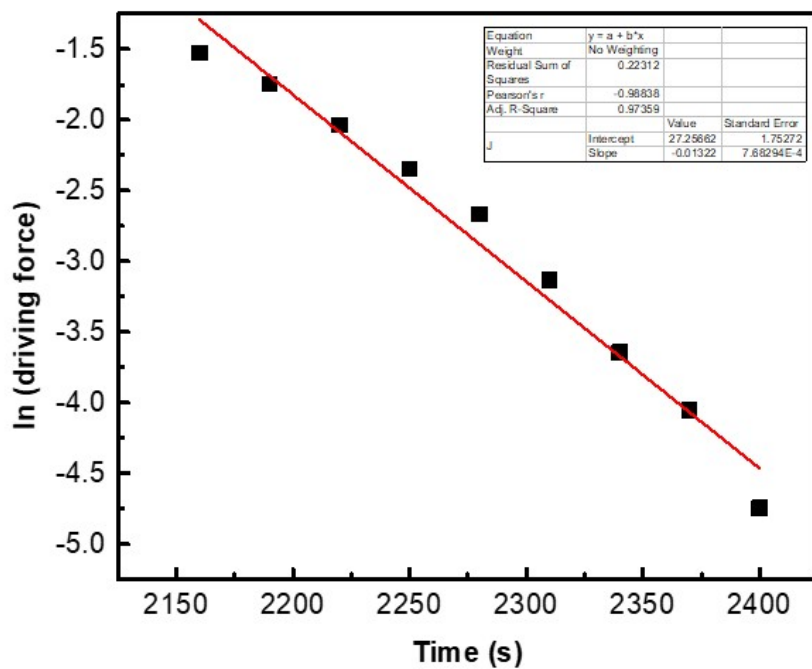

**Fig. S5.** The linear regression plot of the natural logarithm of driving force temperature against time used for calculation of the photothermal efficiency.
